# Supplementary material
Source: PubMed Central journal article supplement (PMC307637)

*est2*  
Subculture 0 1 2 3 4 5 6 7 8 9

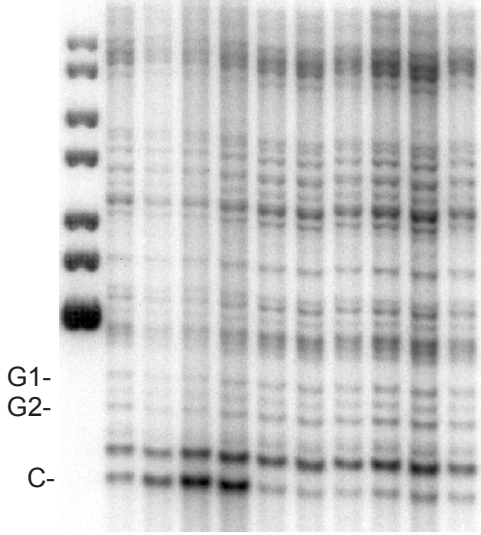

Supplement: pnas_100_26_15736__3.pdf [file pnas_100_26_15736__3.pdf]

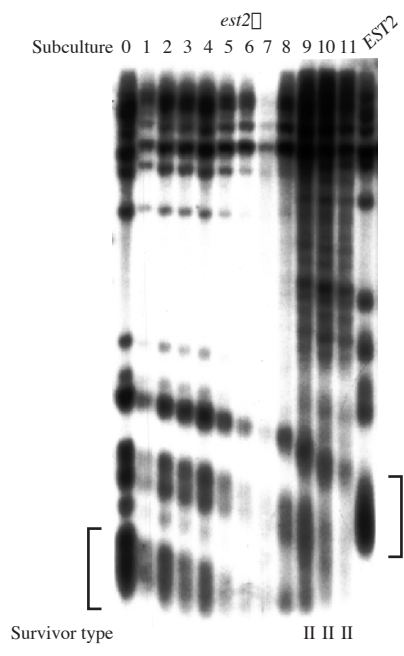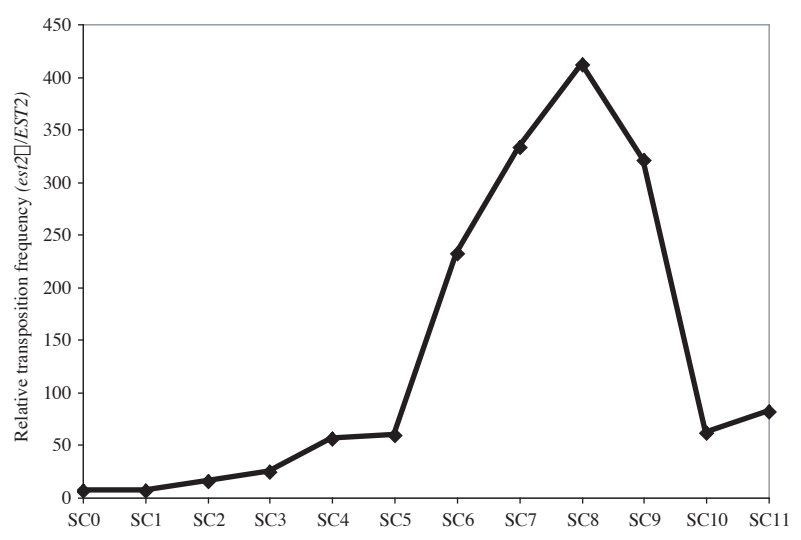

Supplement: pnas_100_26_15736__5.pdf [file pnas_100_26_15736__5.pdf]

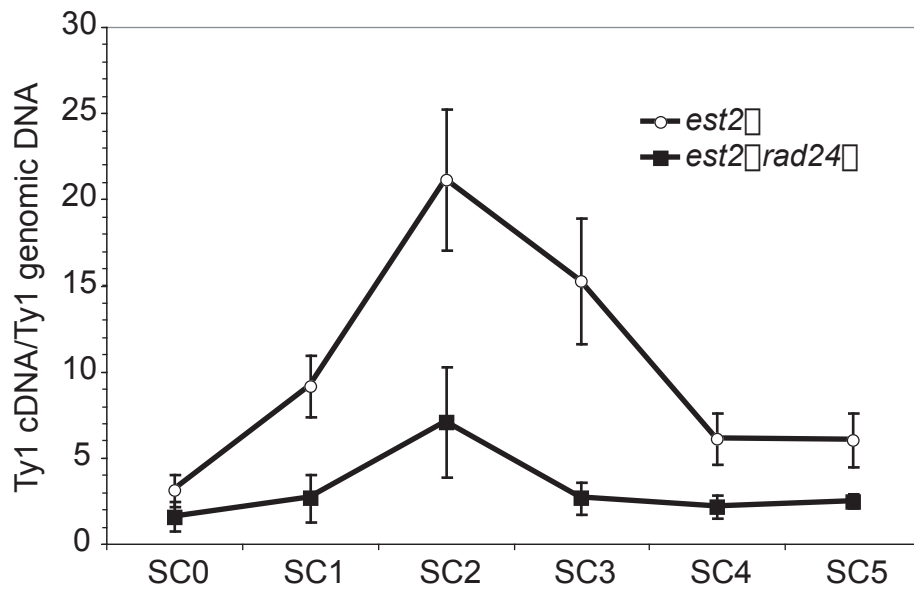

Supplement: pnas_100_26_15736__7.pdf [file pnas_100_26_15736__7.pdf]
